# Supplementary material for: Red Dragon Fruit Peels: Effect of the Proportion and Particle Size on Fibre Quality and Its Application in Reduced-Fat Alpaca-Based Sausages
Source: Preprints.org preprint supplement (doi:10.20944/preprints202401.0213.v1), 2024-01-04
Supplement: Supplementary file 1 [file supplementary]

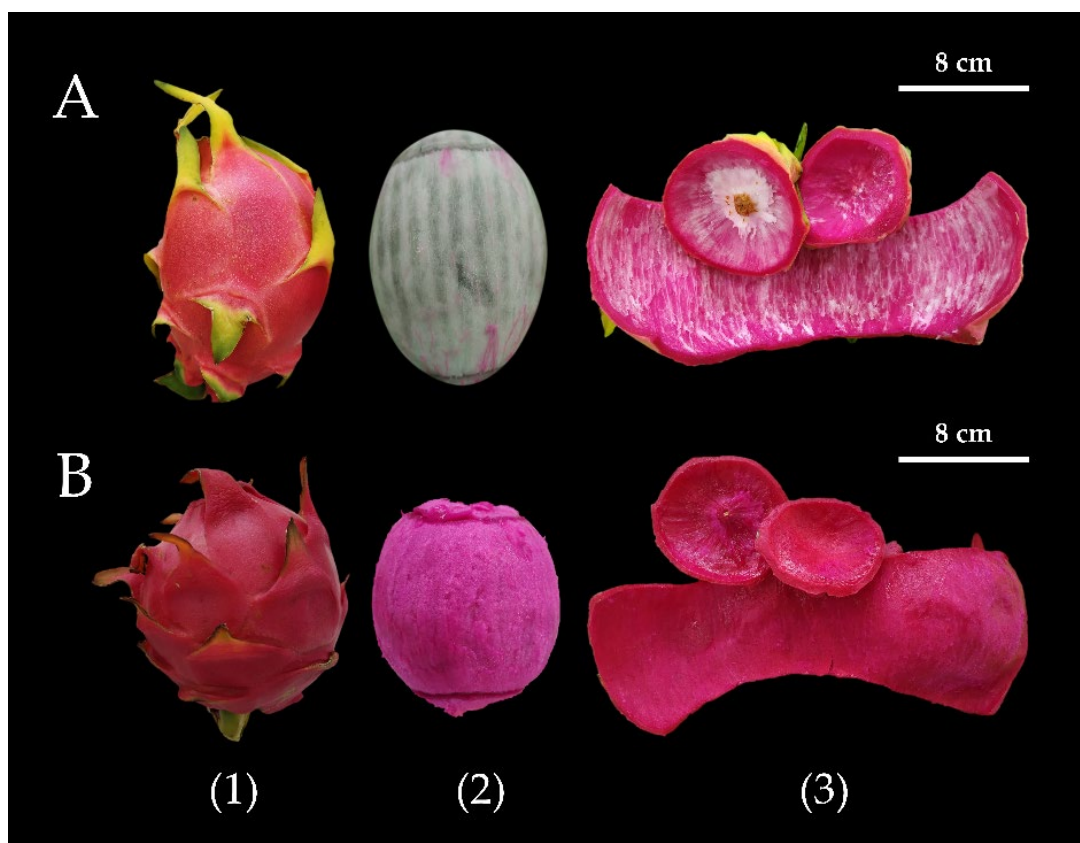

**Figure S1.** Red dragon fruit of (A) *Hylocereus undatus* and (B) *Hylocereus hybridum* species: Morphological features of the entire fruit (1), pulp (2), and peel (3).

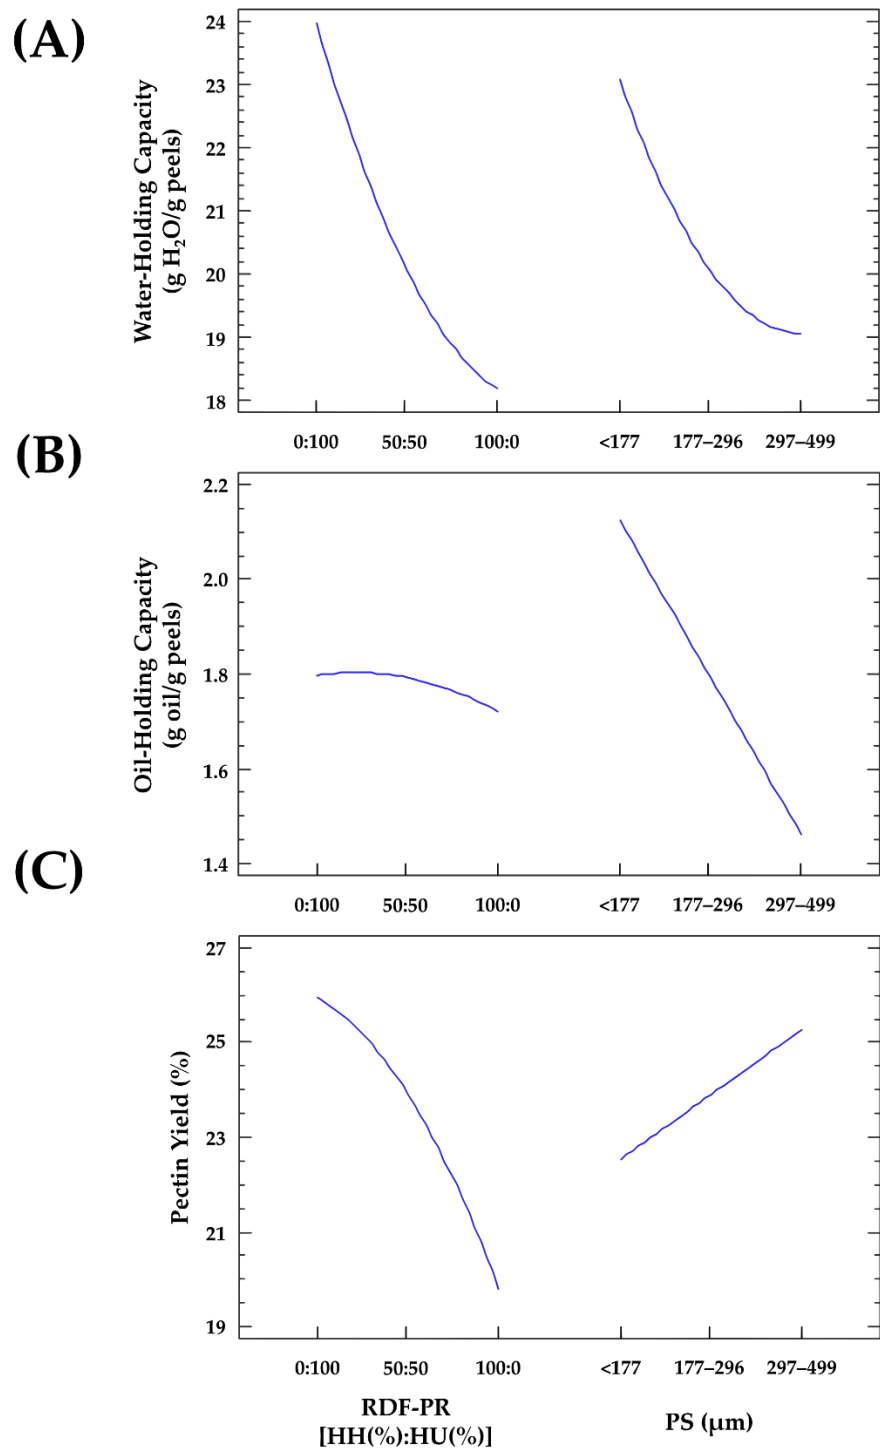

**Figure S2.** Plots of main effects of the optimised dependent variables: water-holding capacity (A), oil-holding capacity (B), and pectin yield (C).

**Table S1.** Characterisation of the physicochemical properties of red dragon fruit species (*Hylocereus undatus* and *Hylocereus hybridum*).

| Physico-chemical properties   | Dragon fruit species       |                            |
|-------------------------------|----------------------------|----------------------------|
|                               | <i>H. undatus</i>          | <i>H. hybridum</i>         |
| LD (cm)                       | 11.5 ± 0.13 <sup>a</sup>   | 10.0 ± 0.25 <sup>b</sup>   |
| TD (cm)                       | 7.79 ± 0.05 <sup>b</sup>   | 8.46 ± 0.02 <sup>a</sup>   |
| W <sub>fruit</sub> (g)        | 336 ± 9.65 <sup>b</sup>    | 393 ± 10.59 <sup>a</sup>   |
| W <sub>peels</sub> (g)        | 80.4 ± 1.01 <sup>a</sup>   | 83.1 ± 2.89 <sup>a</sup>   |
| W <sub>residues</sub> (g)     | 11.6 ± 0.36 <sup>a</sup>   | 6.31 ± 0.32 <sup>b</sup>   |
| W <sub>seeds</sub> (g)        | 9.82 ± 0.66 <sup>a</sup>   | 8.52 ± 0.19 <sup>b</sup>   |
| W <sub>pulp</sub> (g)         | 235 ± 9.14 <sup>b</sup>    | 290 ± 11.78 <sup>a</sup>   |
| Peel thickness (cm)           | 0.347 ± 0.01 <sup>b</sup>  | 0.447 ± 0.03 <sup>a</sup>  |
| Yield <sub>peels</sub> (%)    | 23.9 ± 0.83 <sup>a</sup>   | 22.1 ± 1.16 <sup>a</sup>   |
| Yield <sub>residues</sub> (%) | 3.45 ± 0.04 <sup>a</sup>   | 1.71 ± 0.13 <sup>b</sup>   |
| Yield <sub>seeds</sub> (%)    | 2.85 ± 0.30 <sup>a</sup>   | 2.53 ± 0.24 <sup>a</sup>   |
| Yield <sub>pulp</sub> (%)     | 69.8 ± 0.72 <sup>a</sup>   | 72.2 ± 2.07 <sup>a</sup>   |
| Moisture content (%)          | 88.2 ± 0.90 <sup>b</sup>   | 91.1 ± 0.20 <sup>a</sup>   |
| TSS <sub>peels</sub> (°Brix)  | 0.627 ± 0.01 <sup>a</sup>  | 0.607 ± 0.006 <sup>a</sup> |
| TSS <sub>pulp</sub> (°Brix)   | 10.1 ± 0.12 <sup>a</sup>   | 11.0 ± 0.72 <sup>a</sup>   |
| pH <sub>peels</sub>           | 5.90 ± 0.06 <sup>a</sup>   | 5.85 ± 0.04 <sup>a</sup>   |
| pH <sub>pulp</sub>            | 4.60 ± 0.07 <sup>b</sup>   | 4.84 ± 0.10 <sup>a</sup>   |
| Titrateable acidity (%)       | 0.077 ± 0.004 <sup>b</sup> | 0.133 ± 0.004 <sup>a</sup> |

Data is expressed as means ± standard deviation (n=3). Different letters in the same row indicate significant differences ( $p < 0.05$ ) between red dragon fruit species. LD: Longitudinal diameter; TD: Transverse diameter; W: Weight; TSS: Total soluble solids. Titrateable acidity is expressed in percentage of malic acid.

**Table S2.** 3<sup>k</sup> full factorial design showing the independent variables: red dragon fruit peels ratio (RDF-PR) and particle size (PS) at three levels.

| Treatments | Coded values      |         | Uncoded values          |         |
|------------|-------------------|---------|-------------------------|---------|
|            | RDF-PR<br>[HH:HU] | PS (μm) | RDF-PR<br>[HH(%):HU(%)] | PS (μm) |
| T1         | -1                | -1      | 0:100                   | <177    |
| T2         | -1                | 0       | 0:100                   | 177–296 |
| T3         | -1                | +1      | 0:100                   | 297–499 |
| T4         | 0                 | -1      | 50:50                   | <177    |
| T5         | 0                 | 0       | 50:50                   | 177–296 |
| T6         | 0                 | +1      | 50:50                   | 297–499 |
| T7         | +1                | -1      | 100:0                   | <177    |
| T8         | +1                | 0       | 100:0                   | 177–296 |
| T9         | +1                | +1      | 100:0                   | 297–499 |

RDF-PR (red dragon fruit peels ratio); HH (*Hylocereus hybridum*); HU (*Hylocereus undatus*); PS: (particle size).

**Table S3.** Pearson correlation coefficient ( $r$ ) matrix of the colourimetric ( $L^*$ ,  $a^*$ ,  $b^*$ ,  $C$ , and  $h^\circ$ ), techno-functional (WHC, OHC, SC) and physico-chemical (PY, CF, DE) properties of red dragon fruit peel powder (RDF-PP).

| Dependent variables | $L^*$        | $a^*$        | $b^*$        | $C$          | $h^\circ$    | WHC          | OHC          | SC           | PY           | CF           | DE           |
|---------------------|--------------|--------------|--------------|--------------|--------------|--------------|--------------|--------------|--------------|--------------|--------------|
| $L^*$               | 1.0000       | 0.8331       | -0.9120      | 0.8338       | 0.4293       | 0.5557       | 0.8709       | 0.9479       | -0.1000      | -0.6434      | -0.6134      |
|                     | $p = -$      | $p < 0.0001$ | $p < 0.0001$ | $p < 0.0001$ | $p = 0.0254$ | $p = 0.0026$ | $p < 0.0001$ | $p < 0.0001$ | $p = 0.6197$ | $p = 0.0003$ | $p = 0.0007$ |
| $a^*$               | 0.8331       | 1.0000       | -0.8613      | 0.9999       | 0.4798       | 0.4267       | 0.9833       | 0.9234       | -0.2706      | -0.6501      | -0.4065      |
|                     | $p < 0.0001$ | $p = -$      | $p < 0.0001$ | $p < 0.0001$ | $p = 0.0113$ | $p = 0.0264$ | $p < 0.0001$ | $p < 0.0001$ | $p = 0.1723$ | $p = 0.0002$ | $p = 0.0353$ |
| $b^*$               | -0.9120      | -0.8613      | 1.0000       | -0.8596      | -0.3032      | -0.3846      | -0.8691      | -0.9293      | 0.4005       | 0.7274       | 0.5817       |
|                     | $p < 0.0001$ | $p < 0.0001$ | $p = -$      | $p < 0.0001$ | $p = 0.1242$ | $p = 0.0476$ | $p < 0.0001$ | $p < 0.0001$ | $p = 0.0384$ | $p < 0.0001$ | $p = 0.0014$ |
| $C$                 | 0.8338       | 0.9999       | -0.8596      | 1.0000       | 0.4850       | 0.4249       | 0.9834       | 0.9228       | -0.2679      | -0.6511      | -0.4070      |
|                     | $p < 0.0001$ | $p < 0.0001$ | $p < 0.0001$ | $p = -$      | $p = 0.0103$ | $p = 0.0272$ | $p < 0.0001$ | $p < 0.0001$ | $p = 0.1767$ | $p = 0.0002$ | $p = 0.0351$ |
| $h^\circ$           | 0.4293       | 0.4798       | -0.3032      | 0.4850       | 1.0000       | 0.1305       | 0.4917       | 0.4324       | 0.1237       | -0.5711      | -0.2749      |
|                     | $p = 0.0254$ | $p = 0.0113$ | $p = 0.1242$ | $p = 0.0103$ | $p = -$      | $p = 0.5166$ | $p = 0.0092$ | $p = 0.0243$ | $p = 0.5388$ | $p = 0.0019$ | $p = 0.1652$ |
| WHC                 | 0.5557       | 0.4267       | -0.3846      | 0.4249       | 0.1305       | 1.0000       | 0.5059       | 0.6058       | 0.6022       | 0.1150       | -0.2728      |
|                     | $p = 0.0026$ | $p = 0.0264$ | $p = 0.0476$ | $p = 0.0272$ | $p = 0.5166$ | $p = -$      | $p = 0.0071$ | $p = 0.0008$ | $p = 0.0009$ | $p = 0.5678$ | $p = 0.1686$ |
| OHC                 | 0.8709       | 0.9833       | -0.8691      | 0.9834       | 0.4917       | 0.5059       | 1.0000       | 0.9404       | -0.1744      | -0.6411      | -0.3958      |
|                     | $p < 0.0001$ | $p < 0.0001$ | $p < 0.0001$ | $p < 0.0001$ | $p = 0.0092$ | $p = 0.0071$ | $p = -$      | $p < 0.0001$ | $p = 0.3844$ | $p = 0.0003$ | $p = 0.0409$ |
| SC                  | 0.9479       | 0.9234       | -0.9293      | 0.9228       | 0.4324       | 0.6058       | 0.9404       | 1.0000       | -0.1216      | -0.6273      | -0.5591      |
|                     | $p < 0.0001$ | $p < 0.0001$ | $p < 0.0001$ | $p < 0.0001$ | $p = 0.0243$ | $p = 0.0008$ | $p < 0.0001$ | $p = -$      | $p = 0.5456$ | $p = 0.0005$ | $p = 0.0024$ |
| PY                  | -0.1000      | -0.2706      | 0.4005       | -0.2679      | 0.1237       | 0.6022       | -0.1744      | -0.1216      | 1.0000       | 0.5426       | 0.1436       |
|                     | $p = 0.6197$ | $p = 0.1723$ | $p = 0.0384$ | $p = 0.1767$ | $p = 0.5388$ | $p = 0.0009$ | $p = 0.3844$ | $p = 0.5456$ | $p = -$      | $p = 0.0035$ | $p = 0.4748$ |
| CF                  | -0.6434      | -0.6501      | 0.7274       | -0.6511      | -0.5711      | 0.1150       | -0.6411      | -0.6273      | 0.5426       | 1.0000       | 0.5577       |
|                     | $p = 0.0003$ | $p = 0.0002$ | $p < 0.0001$ | $p = 0.0002$ | $p = 0.0019$ | $p = 0.5678$ | $p = 0.0003$ | $p = 0.0005$ | $p = 0.0035$ | $p = -$      | $p = 0.0025$ |
| DE                  | -0.6134      | -0.4065      | 0.5817       | -0.4070      | -0.2749      | -0.2728      | -0.3958      | -0.5591      | 0.1436       | 0.5577       | 1.0000       |
|                     | $p = 0.0007$ | $p = 0.0353$ | $p = 0.0014$ | $p = 0.0351$ | $p = 0.1652$ | $p = 0.1686$ | $p = 0.0409$ | $p = 0.0024$ | $p = 0.4748$ | $p = 0.0025$ | $p = -$      |

WHC: water-holding capacity (g H<sub>2</sub>O/g peels); OHC: oil-holding capacity (g oil/g peels); SC: swelling capacity (ml H<sub>2</sub>O/g peels); PY: pectin yield (%); CF: crude fiber (%); DE: degree of esterification (%). “-”: indicates a lack of statistically significant association between the same dependent variables.

**Table S4.** Sensory properties of emulsified alpaca-based sausages with different substitution levels of pork-back fat by the optimal red dragon fruit peel powder (RDF-PP) from treatment one (T1).

| Treatment | Appearance               | Colour                   | Odour                    | Flavour                  | Texture                  | Overall acceptability    |
|-----------|--------------------------|--------------------------|--------------------------|--------------------------|--------------------------|--------------------------|
| C         | 5.51 ± 1.50 <sup>a</sup> | 5.44 ± 1.48 <sup>a</sup> | 5.48 ± 1.85 <sup>a</sup> | 5.07 ± 1.76 <sup>b</sup> | 5.43 ± 1.73 <sup>b</sup> | 5.51 ± 1.69 <sup>b</sup> |
| OF3       | 5.85 ± 1.68 <sup>a</sup> | 5.83 ± 1.68 <sup>a</sup> | 5.93 ± 1.90 <sup>a</sup> | 5.89 ± 1.76 <sup>a</sup> | 6.12 ± 1.64 <sup>a</sup> | 6.27 ± 1.63 <sup>a</sup> |

Mean values with different superscript letters within a column indicate significant difference ( $p < 0.05$ ) between treatments. C: control formulation of emulsified alpaca-based sausages with 0.00% hydrated RDF-PP; OF3: optimal formulation 3 (with 9.86% RDF-PP).

**Table S5.** Mann-Whitney U test for the sensory properties of emulsified alpaca-based sausages with different pork-back fat substitution levels between: control formulation of emulsified alpaca-based sausages with 0.00% hydrated RDF-PP (C) and optimal formulation 3 (OF3).

| Variable              | Rank Sum C | Rank Sum OF3 | U       | Z       | Z p-value | Z adj.  | Z adj. p-value | Valid N C | Valid N OF3 |
|-----------------------|------------|--------------|---------|---------|-----------|---------|----------------|-----------|-------------|
| Appearance            | 5249.00    | 6076.00      | 2399.00 | -1.5523 | 0.1205    | -1.5791 | 0.1143         | 75        | 75          |
| Color                 | 5287.00    | 6038.00      | 2437.00 | -1.4095 | 0.1586    | -1.4352 | 0.1512         | 75        | 75          |
| Odor                  | 5231.00    | 6094.00      | 2381.00 | -1.6200 | 0.1052    | -1.6404 | 0.1009         | 75        | 75          |
| Flavor                | 4911.50    | 6413.50      | 2061.50 | -2.8209 | 0.0047    | -2.8608 | 0.0042         | 75        | 75          |
| Texture               | 5025.00    | 6300.00      | 2175.00 | -2.3943 | 0.0166    | -2.4297 | 0.0151         | 75        | 75          |
| Overall acceptability | 4945.50    | 6379.50      | 2095.50 | -2.6931 | 0.0070    | -2.7303 | 0.0063         | 75        | 75          |

U: Mann-Whitney U statistic; Z: Z-score; Z adj.: Z adjusted; N: total number of experiments; C: control formulation of emulsified alpaca-based sausages with 0.00% hydrated RDF-PP; OF3: optimal formulation 3 (with 9.86% RDF-PP).

**Table S6.** Pork-back fat (%), red dragon fruit peel powder (RDF-PP), and water content of emulsified alpaca-based sausages based on a 2000 g formulation.

| Formulation | Pork-back fat (%) | RDF-PP (g)  | RDF-PP (%)  | Water (g)     | Water (%)   |
|-------------|-------------------|-------------|-------------|---------------|-------------|
| C           | 15.00             | 0.00        | 0.00        | 0.00          | 0.00        |
| F1          | 11.71             | 2.00        | 0.10        | 63.72         | 3.19        |
| F2          | 8.43              | 4.00        | 0.20        | 127.44        | 6.37        |
| <b>F3</b>   | <b>5.14</b>       | <b>6.00</b> | <b>0.30</b> | <b>191.16</b> | <b>9.56</b> |

C: control formulation of emulsified alpaca-based sausages with 0.00% hydrated RDF-PP; F1: emulsified alpaca-based sausages with 3.29% hydrated RDF-PP; F2: emulsified alpaca-based sausages with 6.57% hydrated RDF-PP; F3: emulsified alpaca-based sausages with 9.86% hydrated RDF-PP.
